# Supplementary material
Source: PubMed Central journal article supplement (PMC4165599)
Supplement: NIHMS621907-supplement-01.pdf [file NIHMS621907-supplement-01.pdf]

**A**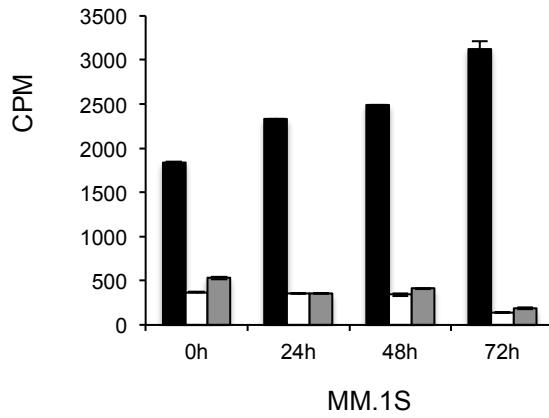**B**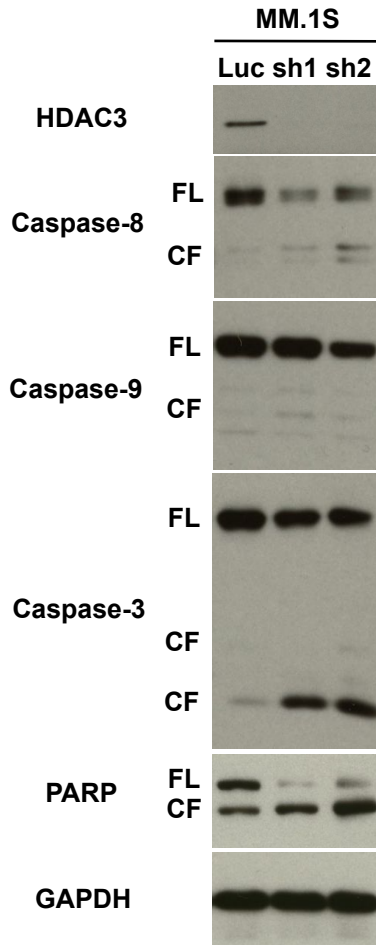**Supplementary Figure 1**

A

Scheme:1

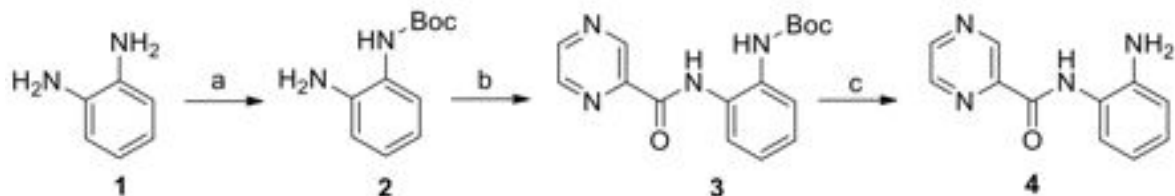

Reagents & conditions: (a).  $\text{Boc}_2\text{O}$ , 4-DMAP, THF, 2h, RT (b). pyrazine-2-carboxylic acid, EDCI, 4-DMAP(cat), DCM:pyridine (1:1), RT, 2h (c) DCM:THF (1:1), RT, 30min

B

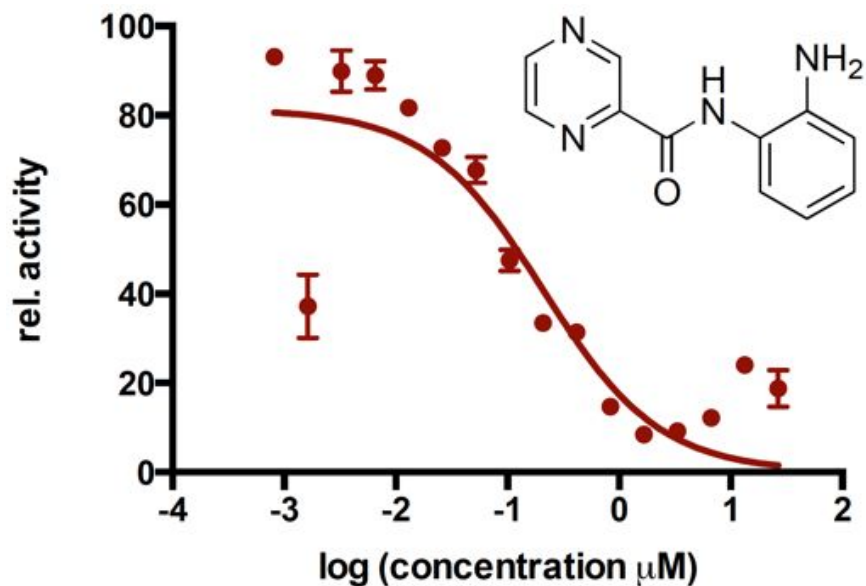

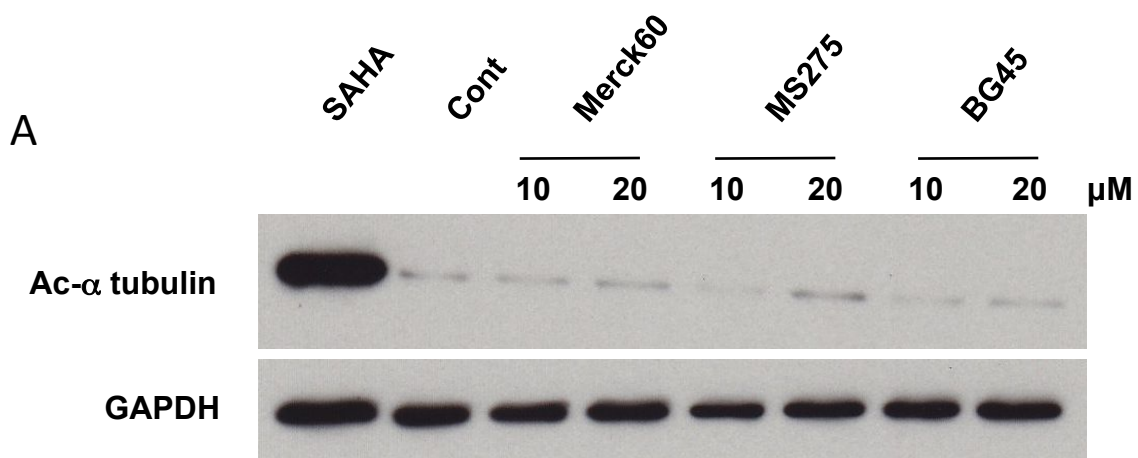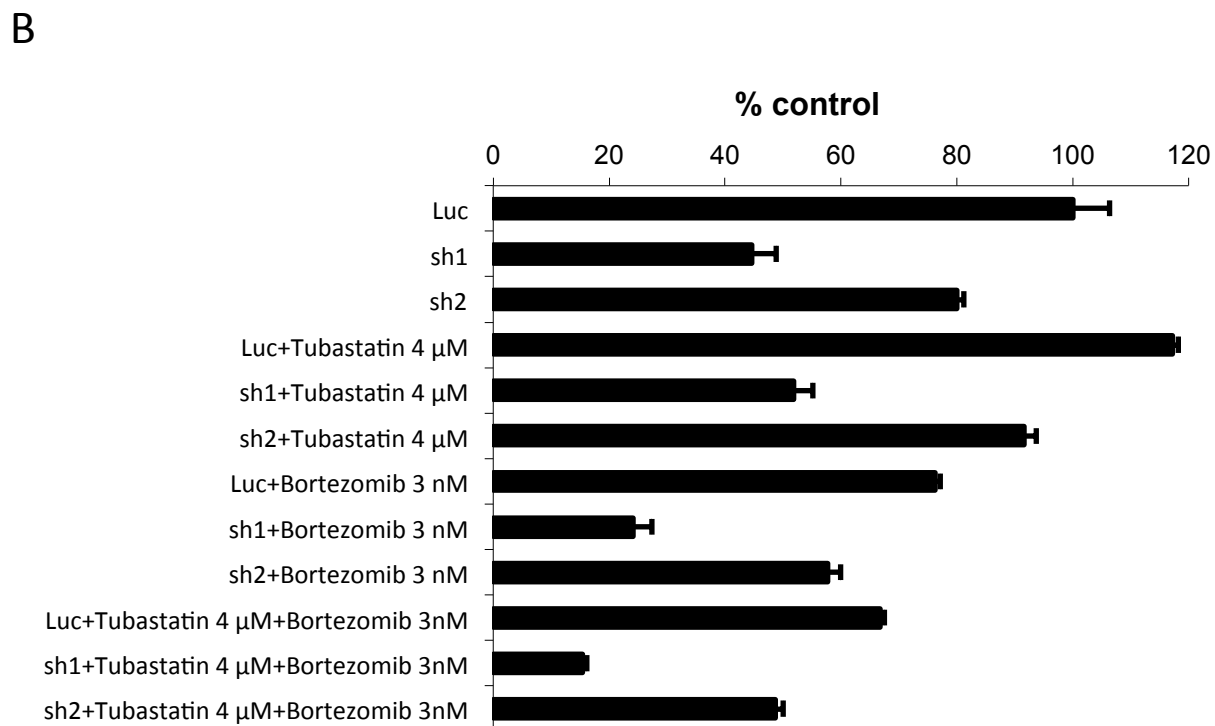

**Supplementary Figure 3**
